# Supplementary material
Source: Royal Society of Chemistry journal article supplement (doi:10.1039/d6ce00222f)
Supplement: d6ce00222f1.pdf [file d6ce00222f1.pdf]

## Layered sql-Type Cobalt Triazine–Carboxylate MOF for Enhanced Pseudocapacitance and Visible-Light Hydrogen Evolution

Manish Kukreja<sup>a</sup>, Saman Shaheen<sup>b</sup>, Tokeer Ahmad<sup>b</sup>, Musheer Ahmad<sup>c</sup>, Nohyun Lee<sup>d</sup>, Anil Kumar Astakala<sup>d</sup>, Nazrul Haq<sup>e</sup>, Na'il Saleh<sup>f\*</sup>, Kafeel Ahmad Siddiqui<sup>a</sup>

<sup>a</sup>Department of Chemistry, National Institute of Technology Raipur,  
G. E. Road Raipur – 492010, Chhattisgarh, India

<sup>b</sup>Nanochemistry Laboratory, Department of Chemistry, Jamia Millia Islamia, New Delhi,  
Delhi (India) – 110025

<sup>c</sup>Department of Applied Chemistry, Faculty of Engineering and Technology, ZHCET,  
Aligarh Muslim University, Aligarh, UP (India) – 202002

<sup>d</sup>School of Advanced Materials Engineering, Kookmin University, Seoul 02707, South  
Korea

<sup>e</sup>Department of Pharmaceutics, College of Pharmacy, King Saud University, Riyadh  
11451, Saudi Arabia.

<sup>f</sup>Department of Chemistry, College of Science, United Arab Emirates University, POBox  
15551, Al Ain, United Arab Emirates.

<sup>a</sup> e-mail: [kasiddiqui.chy@nitrr.ac.in](mailto:kasiddiqui.chy@nitrr.ac.in)

**Table S1.** Crystallographic and refinement data for the Co-MOF.

|                     |                                                                                |
|---------------------|--------------------------------------------------------------------------------|
| Identification code | Co-MOF                                                                         |
| Empirical formula   | C <sub>24</sub> H <sub>40</sub> Co <sub>3</sub> N <sub>6</sub> O <sub>26</sub> |
| Formula weight      | 1005.41                                                                        |
| Temperature/K       | 293(2)                                                                         |
| Crystal system      | monoclinic                                                                     |

|                                        |                                                               |
|----------------------------------------|---------------------------------------------------------------|
| Space group                            | P2 <sub>1</sub> /n                                            |
| a/Å                                    | 11.88510(17)                                                  |
| b/Å                                    | 7.94529(11)                                                   |
| c/Å                                    | 21.6352(3)                                                    |
| $\alpha$ /°                            | 90                                                            |
| $\beta$ /°                             | 93.4735(13)                                                   |
| $\gamma$ /°                            | 90                                                            |
| Volume/Å <sup>3</sup>                  | 2039.27(5)                                                    |
| Z                                      | 2                                                             |
| $\rho_{\text{calc}}$ /cm <sup>3</sup>  | 1.6372                                                        |
| $\mu$ /mm <sup>-1</sup>                | 1.304                                                         |
| F(000)                                 | 1032.8                                                        |
| Crystal size/mm <sup>3</sup>           | 0.33 × 0.21 × 0.17                                            |
| Radiation                              | Mo K $\alpha$ ( $\lambda$ = 0.71073)                          |
| 2 $\Theta$ range for data collection/° | 3.78 to 54.78                                                 |
| Index ranges                           | -14 ≤ h ≤ 15, -10 ≤ k ≤ 10, -26 ≤ l ≤ 27                      |
| Reflections collected                  | 30888                                                         |
| Independent reflections                | 4410 [R <sub>int</sub> = 0.0315, R <sub>sigma</sub> = 0.0212] |
| Data/restraints/parameters             | 4410/2/301                                                    |

|                                                |                                  |
|------------------------------------------------|----------------------------------|
| Goodness-of-fit on $F^2$                       | 1.050                            |
| Final R indexes [ $I \geq 2\sigma(I)$ ]        | $R_1 = 0.0275$ , $wR_2 = 0.0706$ |
| Final R indexes [all data]                     | $R_1 = 0.0323$ , $wR_2 = 0.0734$ |
| Largest diff. peak/hole / $e \text{ \AA}^{-3}$ | 0.52/-0.47                       |
| CCDC number                                    | 2524495                          |

**Table S2.** Selected bond length between the atoms of  $\{[\text{Co}_3(\text{Tci})_2(\mu_2\text{-H}_2\text{O})_2(\text{H}_2\text{O})_4]\cdot 2\text{H}_2\text{O}\}_n$ .

| Atom       | Atom             | Length/Å    | Atom       | Atom | Length/Å  |
|------------|------------------|-------------|------------|------|-----------|
| <b>Co1</b> | O2               | 1.9798 (12) | <b>O7</b>  | C11  | 1.270 (2) |
| <b>Co1</b> | O2 <sup>1</sup>  | 1.9798 (12) | <b>O8</b>  | C11  | 1.227 (3) |
| <b>Co1</b> | O10              | 2.1410 (13) | <b>O9</b>  | C12  | 1.212 (2) |
| <b>Co1</b> | O10 <sup>1</sup> | 2.1410 (13) | <b>N1</b>  | C3   | 1.469 (2) |
| <b>Co1</b> | O11              | 2.1689 (12) | <b>N1</b>  | C4   | 1.375 (2) |
| <b>Co1</b> | O11 <sup>1</sup> | 2.1689 (12) | <b>N1</b>  | C12  | 1.375 (2) |
| <b>Co2</b> | O1               | 2.0541 (13) | <b>N2</b>  | C4   | 1.380 (2) |
| <b>Co2</b> | O5 <sup>2</sup>  | 2.0621 (13) | <b>N2</b>  | C5   | 1.471 (2) |
| <b>Co2</b> | O10              | 2.1749 (14) | <b>N2</b>  | C8   | 1.377 (2) |
| <b>Co2</b> | O11 <sup>1</sup> | 2.1825 (13) | <b>N3</b>  | C8   | 1.379 (2) |
| <b>Co2</b> | O12              | 2.0592 (15) | <b>N3</b>  | C9   | 1.473 (2) |
| <b>Co2</b> | O13              | 2.0930 (15) | <b>N3</b>  | C12  | 1.383 (2) |
| <b>O1</b>  | C1               | 1.253 (2)   | <b>C1</b>  | C2   | 1.505 (2) |
| <b>O2</b>  | C1               | 1.257 (2)   | <b>C2</b>  | C3   | 1.510 (3) |
| <b>O3</b>  | C4               | 1.211 (2)   | <b>C5</b>  | C6   | 1.511 (3) |
| <b>O4</b>  | C7               | 1.257 (2)   | <b>C6</b>  | C7   | 1.504 (3) |
| <b>O5</b>  | C7               | 1.258 (2)   | <b>C9</b>  | C10  | 1.510 (3) |
| <b>O6</b>  | C8               | 1.211 (2)   | <b>C10</b> | C11  | 1.501 (3) |

<sup>1</sup>2-X,1-Y,1-Z; <sup>2</sup>1/2+X,3/2-Y,-1/2+Z; <sup>3</sup>-1/2+X,3/2-Y,1/2+Z

**Table S3.** Selected bond angles between the atoms of  $\{[\text{Co}_3(\text{Tci})_2(\mu_2\text{-H}_2\text{O})_2(\text{H}_2\text{O})_4]\cdot 2\text{H}_2\text{O}\}_n$ .

| Atom                   | Atom | Atom             | Angle/°    | Atom                   | Atom | Atom             | Angle/°     |
|------------------------|------|------------------|------------|------------------------|------|------------------|-------------|
| <b>O2<sup>1</sup></b>  | Co1  | O2               | 180.0      | <b>Co2<sup>1</sup></b> | O11  | Co1 <sup>1</sup> | 95.28 (5)   |
| <b>O10<sup>1</sup></b> | Co1  | O2               | 88.61 (6)  | <b>C4</b>              | N1   | C3               | 117.11 (14) |
| <b>O10</b>             | Co1  | O2               | 91.39 (6)  | <b>C12</b>             | N1   | C3               | 118.82 (15) |
| <b>O10</b>             | Co1  | O2 <sup>1</sup>  | 88.61 (6)  | <b>C12</b>             | N1   | C4               | 124.04 (15) |
| <b>O10<sup>1</sup></b> | Co1  | O2 <sup>1</sup>  | 91.39 (6)  | <b>C5</b>              | N2   | C4               | 116.83 (14) |
| <b>O10<sup>1</sup></b> | Co1  | O10              | 180.0      | <b>C8</b>              | N2   | C4               | 124.44 (15) |
| <b>O11</b>             | Co1  | O2 <sup>1</sup>  | 90.37 (5)  | <b>C8</b>              | N2   | C5               | 118.65 (14) |
| <b>O11</b>             | Co1  | O2               | 89.63 (5)  | <b>C9</b>              | N3   | C8               | 118.20 (14) |
| <b>O11<sup>1</sup></b> | Co1  | O2 <sup>1</sup>  | 89.63 (5)  | <b>C12</b>             | N3   | C8               | 124.30 (14) |
| <b>O11<sup>1</sup></b> | Co1  | O2               | 90.37 (5)  | <b>C12</b>             | N3   | C9               | 117.48 (14) |
| <b>O11<sup>1</sup></b> | Co1  | O10              | 80.12 (5)  | <b>O2</b>              | C1   | O1               | 125.60 (17) |
| <b>O11</b>             | Co1  | O10              | 99.88 (5)  | <b>C2</b>              | C1   | O1               | 118.26 (17) |
| <b>O11</b>             | Co1  | O10 <sup>1</sup> | 80.12 (5)  | <b>C2</b>              | C1   | O2               | 116.14 (16) |
| <b>O11<sup>1</sup></b> | Co1  | O10 <sup>1</sup> | 99.88 (5)  | <b>C3</b>              | C2   | C1               | 112.00 (16) |
| <b>O11<sup>1</sup></b> | Co1  | O11              | 180.0      | <b>C2</b>              | C3   | N1               | 111.96 (15) |
| <b>O5<sup>2</sup></b>  | Co2  | O1               | 178.28 (5) | <b>N1</b>              | C4   | O3               | 122.05 (17) |
| <b>O10</b>             | Co2  | O1               | 90.33 (6)  | <b>N2</b>              | C4   | O3               | 122.01 (17) |
| <b>O10</b>             | Co2  | O5 <sup>2</sup>  | 91.09 (5)  | <b>N2</b>              | C4   | N1               | 115.94 (15) |

|                        |     |                  |             |     |     |    |             |
|------------------------|-----|------------------|-------------|-----|-----|----|-------------|
| <b>O11<sup>1</sup></b> | Co2 | O1               | 90.75 (5)   | C6  | C5  | N2 | 110.87 (15) |
| <b>O11<sup>1</sup></b> | Co2 | O5 <sup>2</sup>  | 88.56 (5)   | C7  | C6  | C5 | 112.74 (16) |
| <b>O11<sup>1</sup></b> | Co2 | O10              | 79.08 (5)   | O5  | C7  | O4 | 124.37 (16) |
| <b>O12</b>             | Co2 | O1               | 89.35 (7)   | C6  | C7  | O4 | 117.90 (16) |
| <b>O12</b>             | Co2 | O5 <sup>2</sup>  | 89.16 (7)   | C6  | C7  | O5 | 117.73 (16) |
| <b>O12</b>             | Co2 | O10              | 175.59 (6)  | N2  | C8  | O6 | 122.34 (16) |
| <b>O12</b>             | Co2 | O11 <sup>1</sup> | 96.53 (6)   | N3  | C8  | O6 | 122.33 (16) |
| <b>O13</b>             | Co2 | O1               | 89.88 (7)   | N3  | C8  | N2 | 115.33 (15) |
| <b>O13</b>             | Co2 | O5 <sup>2</sup>  | 91.10 (7)   | C10 | C9  | N3 | 110.09 (15) |
| <b>O13</b>             | Co2 | O10              | 90.05 (6)   | C11 | C10 | C9 | 112.78 (16) |
| <b>O13</b>             | Co2 | O11 <sup>1</sup> | 169.11 (6)  | O8  | C11 | O7 | 124.81 (19) |
| <b>O13</b>             | Co2 | O12              | 94.35 (6)   | C10 | C11 | O7 | 116.80 (18) |
| <b>C1</b>              | O1  | Co2              | 129.15 (12) | C10 | C11 | O8 | 118.36 (19) |
| <b>C1</b>              | O2  | Co1 <sup>1</sup> | 132.62 (12) | N1  | C12 | O9 | 122.42 (17) |
| <b>C7</b>              | O5  | Co2 <sup>3</sup> | 126.50 (12) | N3  | C12 | O9 | 121.74 (16) |
| <b>Co2</b>             | O10 | Co1 <sup>1</sup> | 96.32 (5)   | N3  | C12 | N1 | 115.84 (15) |

**Table S4 Solvent masks information for Co-MOF.**

| Number   | X     | Y      | Z     | Volume | Electron count | Content |
|----------|-------|--------|-------|--------|----------------|---------|
| <b>1</b> | 0.000 | -0.321 | 0.000 | 66.3   | 20.7           | ?       |
| <b>2</b> | 0.250 | -0.399 | 0.750 | 52.3   | 18.2           | ?       |
| <b>3</b> | 0.500 | -0.855 | 0.500 | 66.3   | 20.7           | ?       |
| <b>4</b> | 0.750 | -0.384 | 0.250 | 52.3   | 18.2           | ?       |

**Table S5.** Crystallographic parameters of Co-MOF,  $2\theta$ , FWHM,s ( $D_p$ ), interplanar spacing (d), and estimated number of crystalline layers (D/d)

| Planes (hkl) | $2\theta$ (°) | $\theta$ (°) | FWHM (°) | b (rad) | $\theta$ (rad) | $D_p$ (nm) | d-spacing (Å) | d-spacing (nm) | Layers (D/d) |
|--------------|---------------|--------------|----------|---------|----------------|------------|---------------|----------------|--------------|
| (002)        | 8.22          | 4.11         | 0.20     | 0.0034  | 0.071          | 40.65      | 10.71         | 1.07           | 37.99        |
| (101)        | 8.70          | 4.35         | 0.10     | 0.0017  | 0.075          | 81.32      | 10.24         | 1.02           | 79.72        |
| (011)        | 11.86         | 5.93         | 0.10     | 0.0017  | 0.10           | 81.52      | 7.53          | 0.75           | 108.69       |
| (110)        | 13.40         | 6.70         | 0.11     | 0.0019  | 0.11           | 74.22      | 6.66          | 0.66           | 112.45       |
| (013)        | 16.60         | 8.30         | 0.09     | 0.0015  | 0.14           | 91.05      | 5.35          | 0.53           | 171.79       |
| (202)        | 17.48         | 8.74         | 0.10     | 0.0017  | 0.15           | 82.04      | 5.14          | 0.51           | 160.86       |

|                                                    |       |       |      |        |      |              |               |      |        |
|----------------------------------------------------|-------|-------|------|--------|------|--------------|---------------|------|--------|
| (113)                                              | 18.51 | 9.25  | 0.13 | 0.0022 | 0.16 | 63.20        | 4.83          | 0.48 | 131.66 |
| (014)                                              | 19.85 | 9.9   | 0.12 | 0.0020 | 0.17 | 68.60        | 4.52          | 0.45 | 152.44 |
| (114)                                              | 21.59 | 10.78 | 0.12 | 0.0020 | 0.18 | 75.05        | 4.18          | 0.41 | 183.04 |
| (312)                                              | 26.94 | 13.47 | 0.19 | 0.0033 | 0.23 | 43.89        | 3.33          | 0.33 | 133.00 |
| (313)                                              | 28.66 | 14.33 | 0.14 | 0.0024 | 0.25 | 59.78        | 3.16          | 0.31 | 192.83 |
| (404)                                              | 35.37 | 17.68 | 0.10 | 0.0017 | 0.30 | 85.11        | 2.51          | 0.25 | 340.44 |
| Average crystalline size and Average no. of layers |       |       |      |        |      | <b>70.53</b> | <b>150.41</b> |      |        |

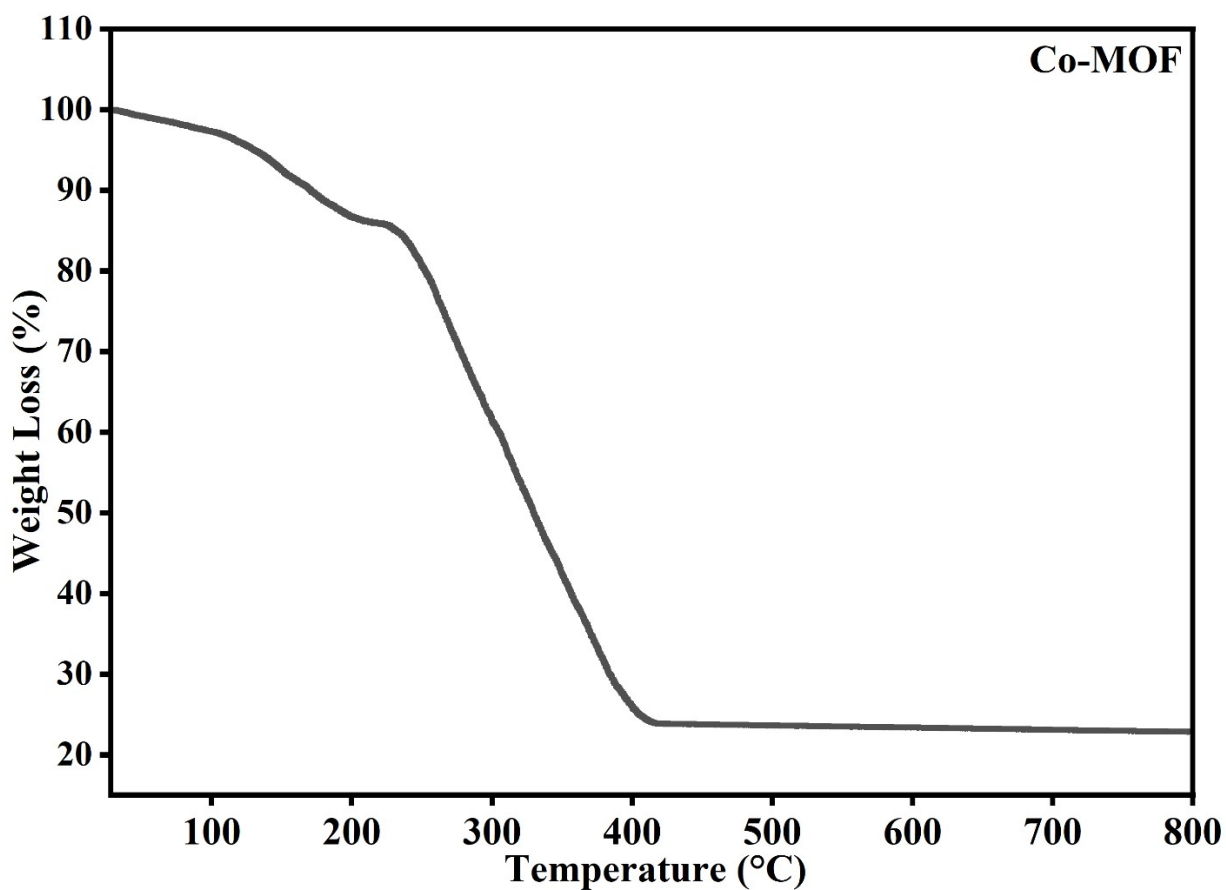

**Fig. S1.** Thermogravimetric curve of  $\{[Co_3(Tci)_2(\mu_2-H_2O)_2(H_2O)_4] \cdot 2H_2O\}_n$ , showing dehydration and subsequent ligand decomposition.

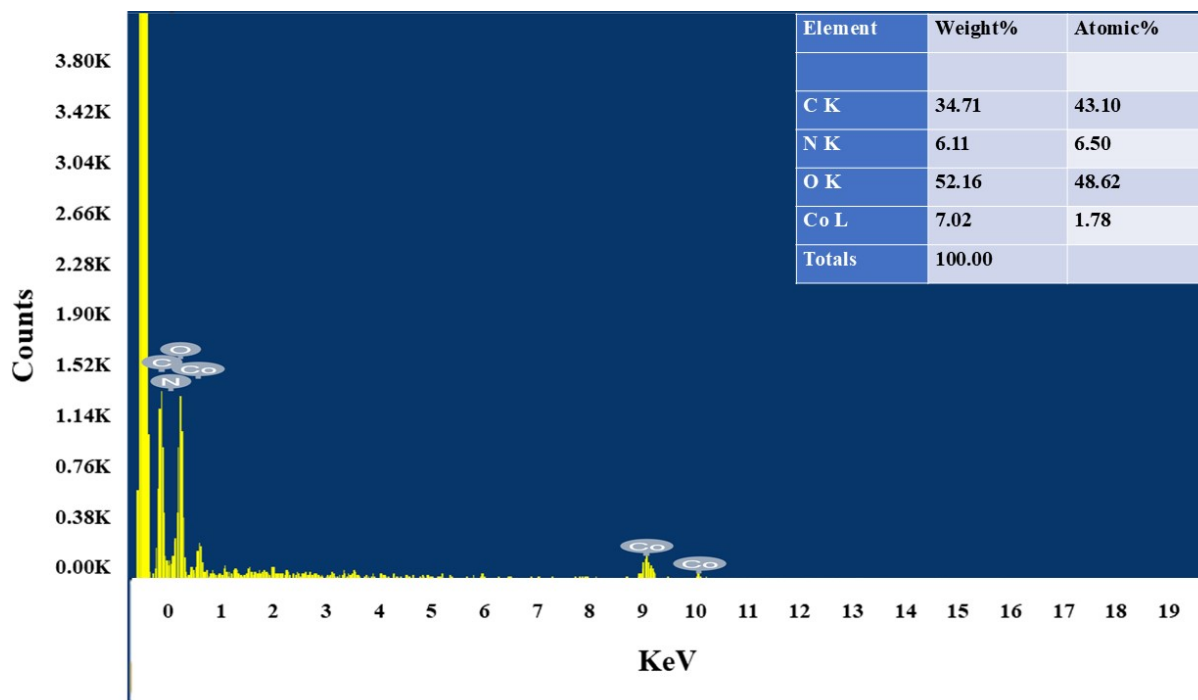

Fig. S2. The EDX spectrum of Co-MOF confirmed the presence and composition of C, N, O, and Co.

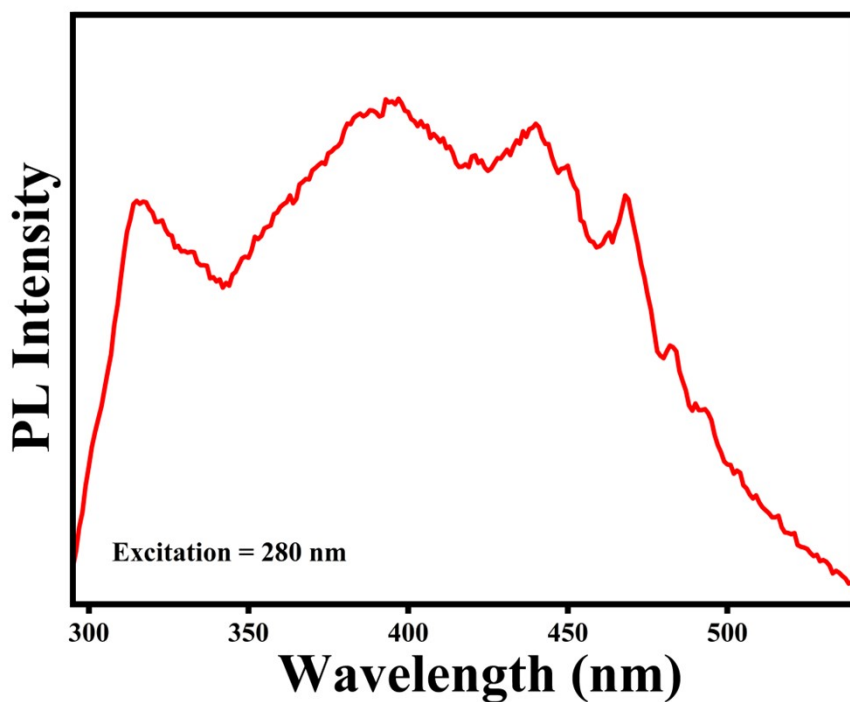

Fig.S3. Photoluminescence spectra of Co-MOF with excitation at 280 nm.

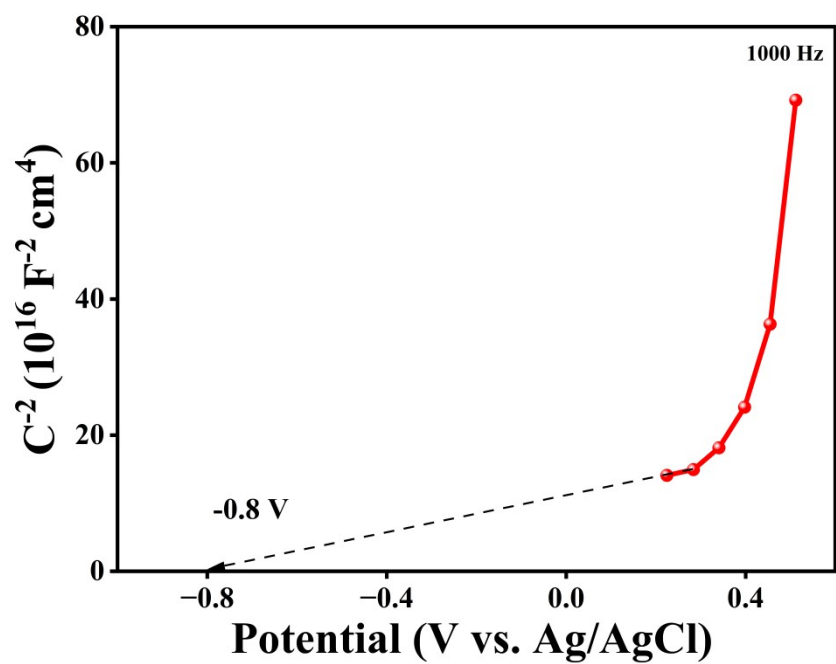

Fig. S4. Mott-Schottky curve of Co-MOF

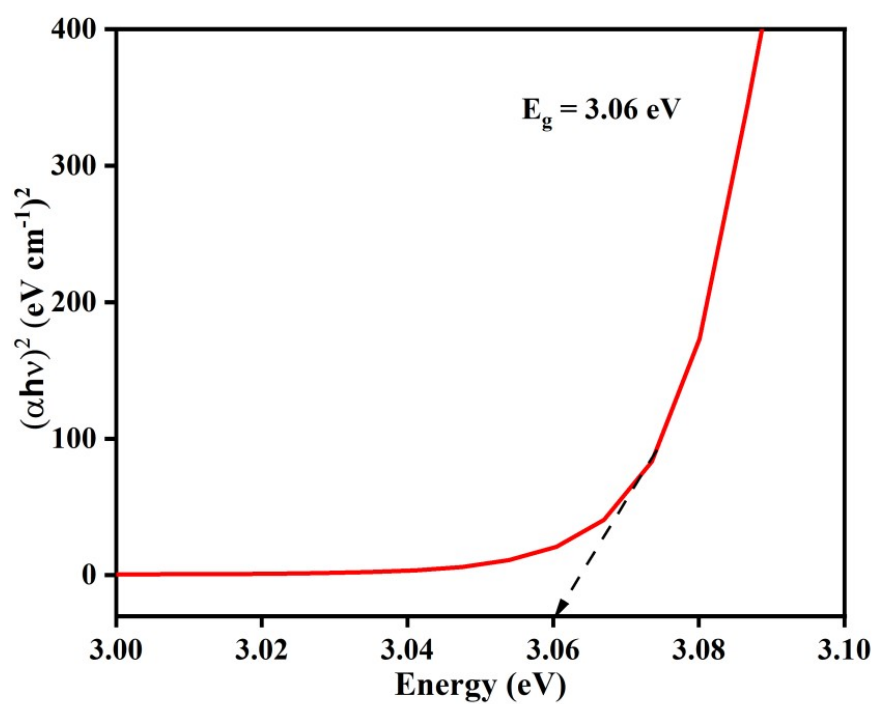

Fig. S5. UV-DRS spectra of Co-MOF

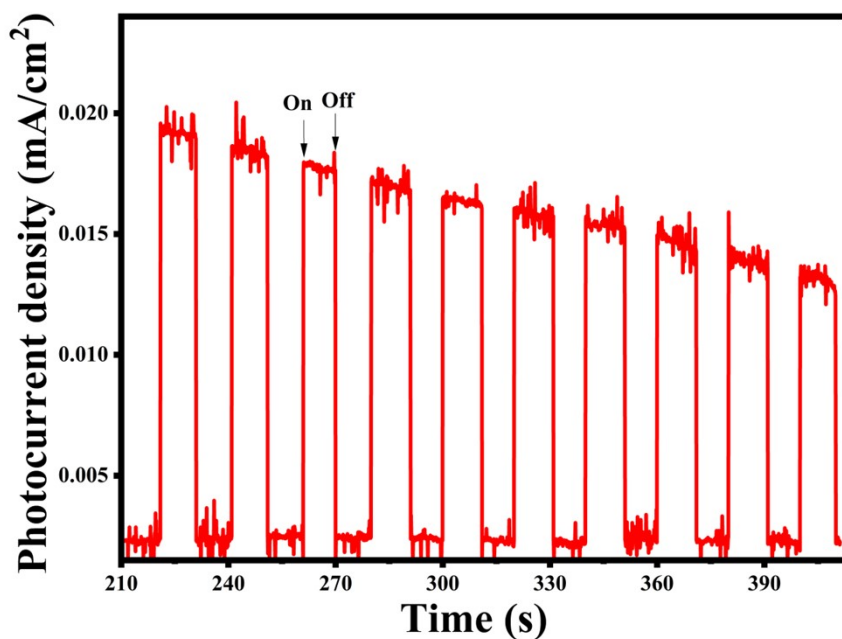

Fig. S6. Transient photocurrent response of Co-MOF

Table S6. Comparative analysis of as-synthesised catalysts.

| Catalysts                                       | Photocatalytic<br>H <sub>2</sub> evolution    | Light source           | Tafel slope (mV/dec) |     | Ref.         |
|-------------------------------------------------|-----------------------------------------------|------------------------|----------------------|-----|--------------|
|                                                 |                                               |                        | EC                   | PEC |              |
| Co-MOF                                          | 6.03 mmol<br>h <sup>-1</sup> g <sup>-1</sup>  | 200 W<br>Xenon<br>Lamp | 107.5                | 86  | This<br>work |
| CIZS/Ni-MOF                                     | 2.64 mmol<br>h <sup>-1</sup> g <sup>-1</sup>  | 300 W<br>Xenon<br>Lamp | -                    | -   | 1            |
| ZnIn <sub>2</sub> S <sub>4</sub> @Ni-<br>MOF-74 | 1.823 mmol<br>h <sup>-1</sup> g <sup>-1</sup> | 300 W<br>Xenon<br>Lamp | -                    | -   | 2            |
| CuCoNi-                                         | -                                             | -                      | 116.1                | -   | 3            |

|                   |   |   |       |   |   |
|-------------------|---|---|-------|---|---|
| LTH/Cu-<br>BTC/CF |   |   |       |   |   |
| Co-MOF@Zn-<br>800 | - | - | 146.6 | - | 4 |
| Co/NC@PMDA        | - | - | 135.3 | - | 5 |

## References

1. Dong, Z.; Wu, Y.; Thirugnanam, N.; Li, G. Double Z-scheme ZnO/ZnS/g-C<sub>3</sub>N<sub>4</sub> ternary structure for efficient photocatalytic H<sub>2</sub> production. *Appl. Surf. Sci.* **2018**, *430*, 293-300.
2. Fu, J.; Xu, Q.; Low, J.; Jiang, C.; Yu, J. Ultrathin 2D/2D WO<sub>3</sub>/g-C<sub>3</sub>N<sub>4</sub> step-scheme H<sub>2</sub>-production photocatalyst. *Appl. Catal. B-Environ.* **2018**, *243*, 556-565.
3. Hu, C.; Jhao, Y.K.; Chang, Y.T.; Kao, L.H.; Chuang, K.S.; Huang, J.H.; Wibowo, A. Type-II heterojunction of g-C<sub>3</sub>N<sub>4</sub>/TiO<sub>2</sub> hollow spheres for photocatalytic H<sub>2</sub> production and degradation of organic contaminants in water. *J. Alloys Compd.* **2025**, *1032*, 181104.
4. Wang, F.; Hu, J.; Liang, R.; Lei, W.; Lou, Z.; Pan, X.; Lu, B.; Ye, Z. Novel ReS<sub>2</sub>/g-C<sub>3</sub>N<sub>4</sub> heterojunction photocatalyst formed by electrostatic self-assembly with increased H<sub>2</sub> production. *Int. J. Hydrogen Energy* **2022**, *47*, 29284-29294.
5. Mehtab, A.; Ahmad, T. Unveiling the bifunctional photo/electrocatalytic activity of in situ grown CdSe QDs on g-C<sub>3</sub>N<sub>4</sub> nanosheet Z-scheme heterostructures for efficient hydrogen generation. *ACS Catal.* **2024**, *14*, 691-702.
6. Pina-Perez, Y.; Samaniego-Benitez, E.; Sierra-Urbe, J.H.; Gonzalez, F.; Tzompantzi, F.; Lartundo-Rojas, L.; Mantilla, A. Effect of synthesis conditions on the photocatalytic behavior of ZnS-ZnO heterojunctions for the H<sub>2</sub> generation. *J. Environ. Chem. Eng.* **2023**, *11*, 109760.
